# Supplementary material
Source: PubMed Central journal article supplement (PMC3906584)
Supplement: NIHMS546179-supplement-01.pdf [file NIHMS546179-supplement-01.pdf]

# **Biodistribution, pharmacokinetics, and blood compatibility of native and PEGylated tobacco mosaic virus nano-rods and -spheres in mice**

Michael A. Bruckman<sup>1</sup>, Lauren N. Randolph<sup>1</sup>, Allen VanMeter<sup>1</sup>, Stephen Hern<sup>1</sup>, Andrew J. Shoffstall<sup>1</sup>, and Rebecca E. Taurog<sup>5</sup>, Nicole F. Steinmetz<sup>\*1,2,3,4</sup>

Department of <sup>1</sup>Biomedical Engineering, <sup>2</sup>Radiology, <sup>3</sup>Materials Science and Engineering, <sup>4</sup>Macromolecular Science and Engineering, Case Western Reserve University, 10900 Euclid Ave., Cleveland, OH 44106, USA. <sup>5</sup> Department of Chemistry, Williams College, 47 Lab Campus Drive, Williamstown, MA 01267, USA.

\* **Corresponding author:** Prof. Nicole F. Steinmetz, Department of Biomedical Engineering, Radiology, Materials Science and Engineering, Macromolecular Science and Engineering, Case Western Reserve University, Schools of Medicine and Engineering, 10900 Euclid Avenue, Cleveland, OH 44106, USA, phone: 216-844-8164, email: nicole.steinmetz@case.edu

**Acknowledgements:** This work was supported by NIH P30 EB011317 grant, Mt. Sinai Foundation, and NIH T32 HL105338 training grant. Dr. Marianne Manchester (UCSD) and Dr. Jack Johnson (TSRI) are thanked for helpful discussion.

**Keywords:** viral nanoparticle, tobacco mosaic virus, PEGylation, nanoparticle shape, biodistribution, blood compatibility, pharmacokinetics

| <b>Particle formulation</b> | <b>Time post administration</b> | <b>Tissue analyzed</b> | <b>Cell Stain</b> | <b>M2 co-localization coefficient</b> |
|-----------------------------|---------------------------------|------------------------|-------------------|---------------------------------------|
| Cy5-TMV                     | 4                               | Liver                  | F4/80             | 0.719                                 |
| Cy5-TMV                     | 24                              | Liver                  | F4/80             | 0.753                                 |
| Cy5-TMV                     | 96                              | Liver                  | F4/80             | 0.753                                 |
| Cy5-TMV                     | 4                               | Spleen                 | F4/80             | 0.708                                 |
| Cy5-TMV                     | 24                              | Spleen                 | F4/80             | 0.172                                 |
| Cy5-TMV                     | 96                              | Spleen                 | F4/80             | 0.358                                 |
| Cy5-TMV                     | 4                               | Spleen                 | B220              | 0.351                                 |
| Cy5-TMV                     | 24                              | Spleen                 | B220              | 0.972                                 |
| Cy5-TMV                     | 96                              | Spleen                 | B220              | 0.981                                 |
| PEG-Cy5-TMV                 | 4                               | Liver                  | F4/80             | 0.567                                 |
| PEG-Cy5-TMV                 | 24                              | Liver                  | F4/80             | 0.963                                 |
| PEG-Cy5-TMV                 | 96                              | Liver                  | F4/80             | 0.013                                 |
| PEG-Cy5-TMV                 | 4                               | Spleen                 | F4/80             | 0.542                                 |
| PEG-Cy5-TMV                 | 24                              | Spleen                 | F4/80             | 0.98                                  |
| PEG-Cy5-TMV                 | 96                              | Spleen                 | F4/80             | 0.483                                 |
| PEG-Cy5-TMV                 | 4                               | Spleen                 | B220              | 0.828                                 |
| PEG-Cy5-TMV                 | 24                              | Spleen                 | B220              | 1                                     |
| PEG-Cy5-TMV                 | 96                              | Spleen                 | B220              | 1                                     |
| Cy5-SNP                     | 4                               | Liver                  | F4/80             | 1                                     |
| Cy5-SNP                     | 24                              | Liver                  | F4/80             | 0.959                                 |
| Cy5-SNP                     | 96                              | Liver                  | F4/80             | 0                                     |
| Cy5-SNP                     | 4                               | Spleen                 | F4/80             | 0.762                                 |
| Cy5-SNP                     | 24                              | Spleen                 | F4/80             | 0.254                                 |
| Cy5-SNP                     | 96                              | Spleen                 | F4/80             | 0.763                                 |
| Cy5-SNP                     | 4                               | Spleen                 | B220              | 0.602                                 |
| Cy5-SNP                     | 24                              | Spleen                 | B220              | 0.872                                 |
| Cy5-SNP                     | 96                              | Spleen                 | B220              | 1                                     |

**Supporting Table 1** Manders' M2 colocalization of Cy5-TMV, PEG-Cy5-TMV, and Cy5-SNP with selected cell markers in cryosectioned spleens and livers.

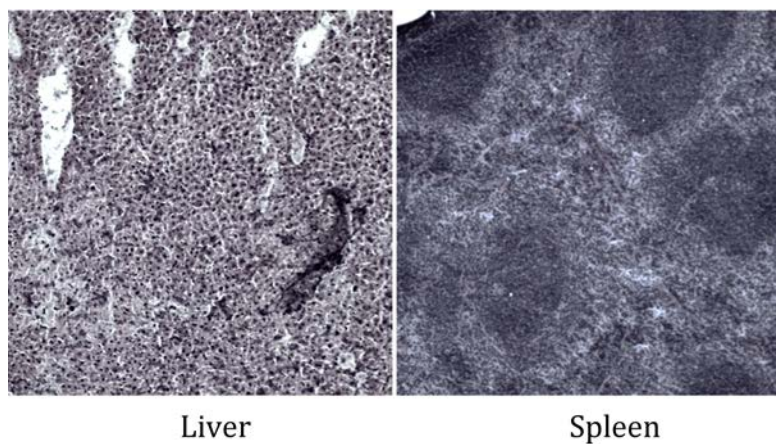

**Supporting Figure 1** Excised liver and spleens from mice injected with PBS were fixed and stained using H&E. Images are 650 x 650  $\mu\text{m}$ .

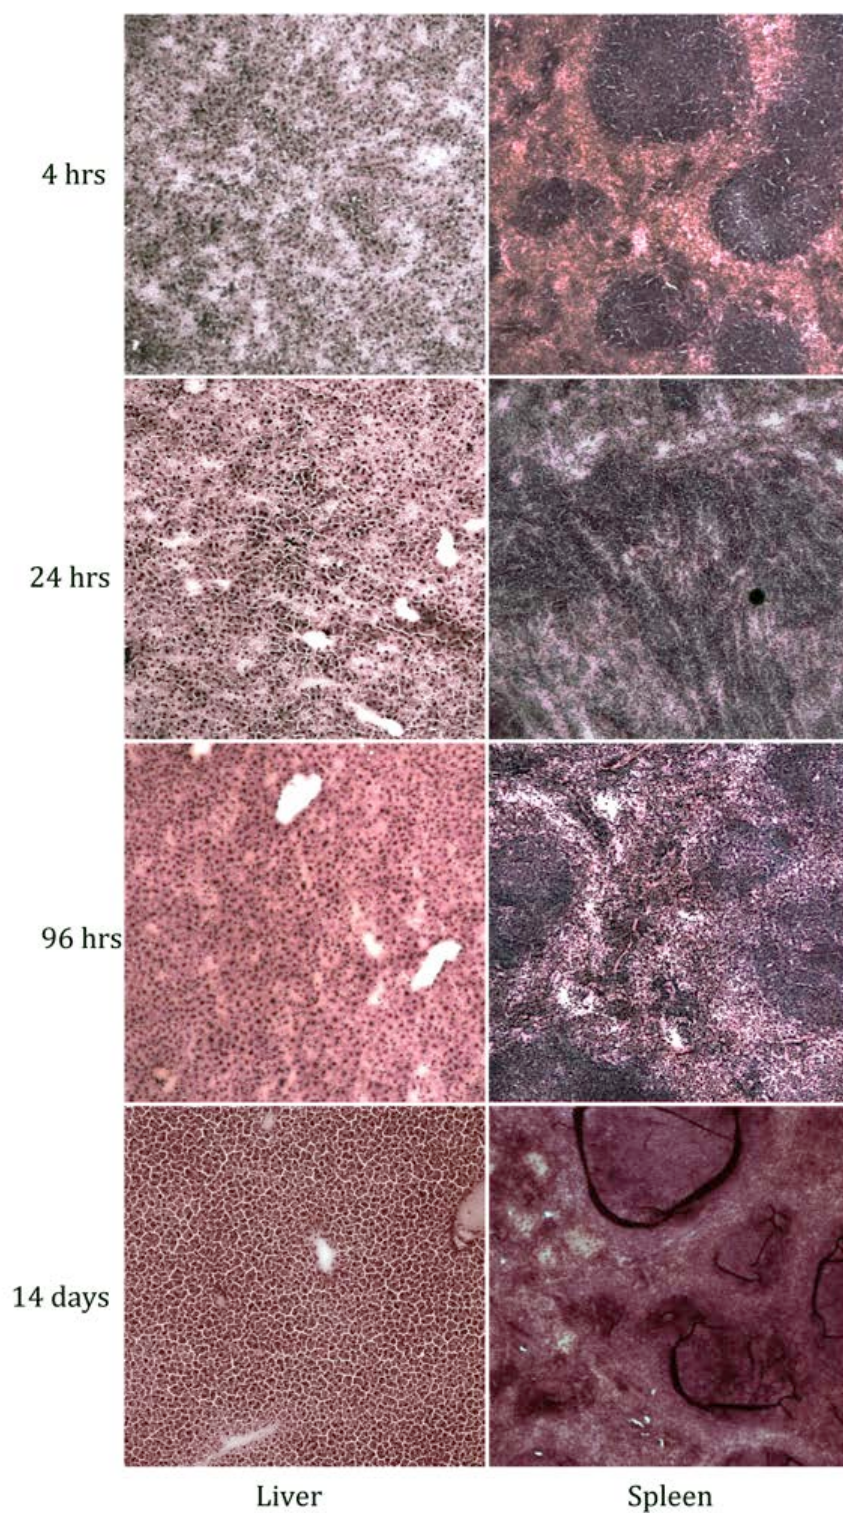

**Supporting Figure 2** Excised liver and spleens from mice 4, 24, 96 hours, and 14 days after being injected with Cy5-TMV were fixed and stained using H&E. No visible signs of toxicity were noticed. Images are 650 x 650  $\mu\text{m}$ .

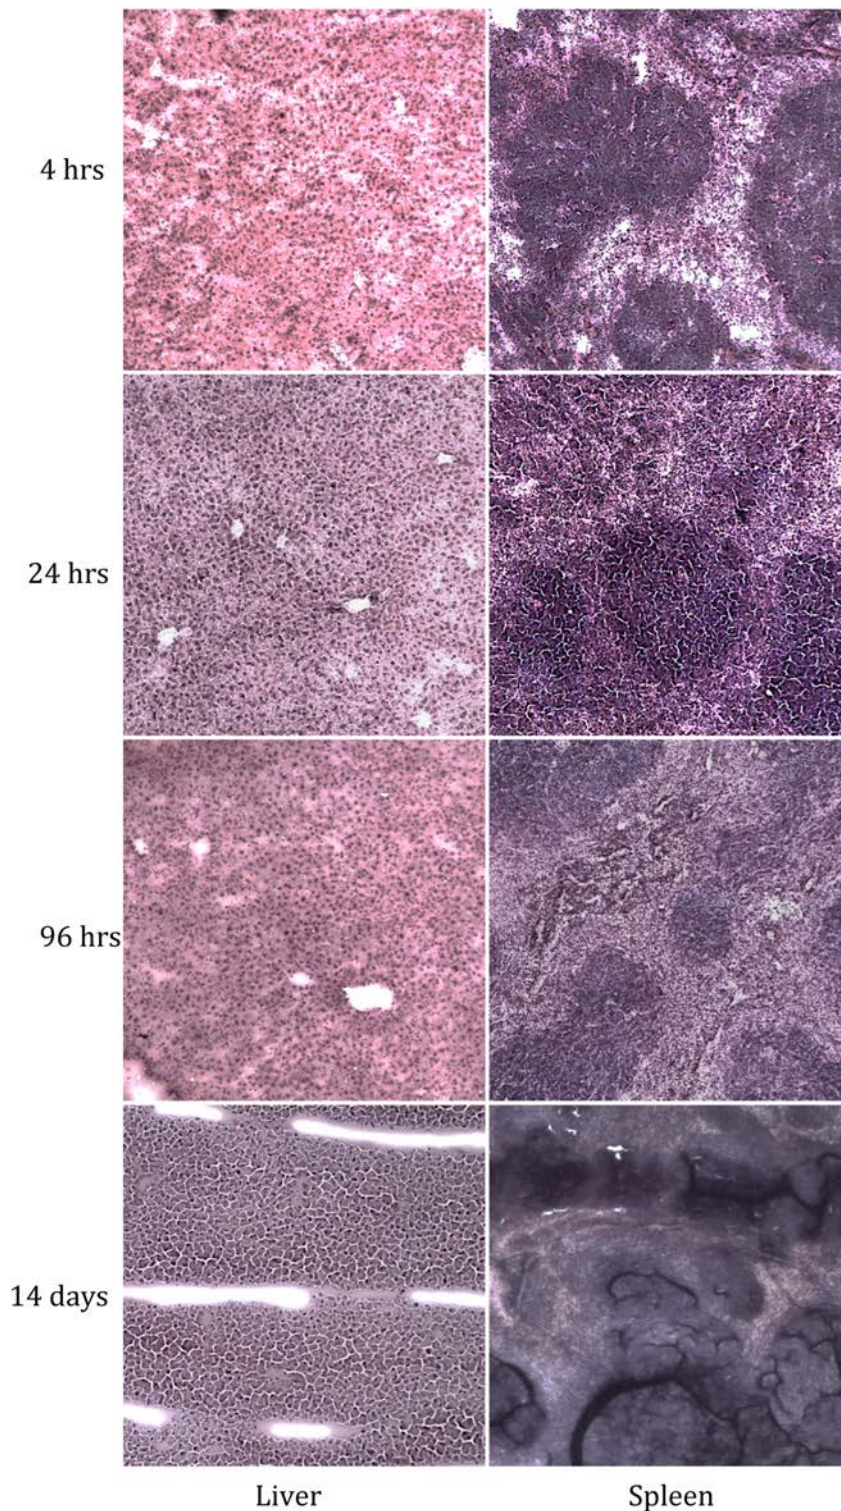

**Supporting Figure 3** Excised liver and spleens from mice 4, 24, 96 hours, and 14 days after being injected with PEG-Cy5-TMV were fixed and stained using H&E. No visible signs of toxicity were noticed. Images are 650 x 650  $\mu\text{m}$ .

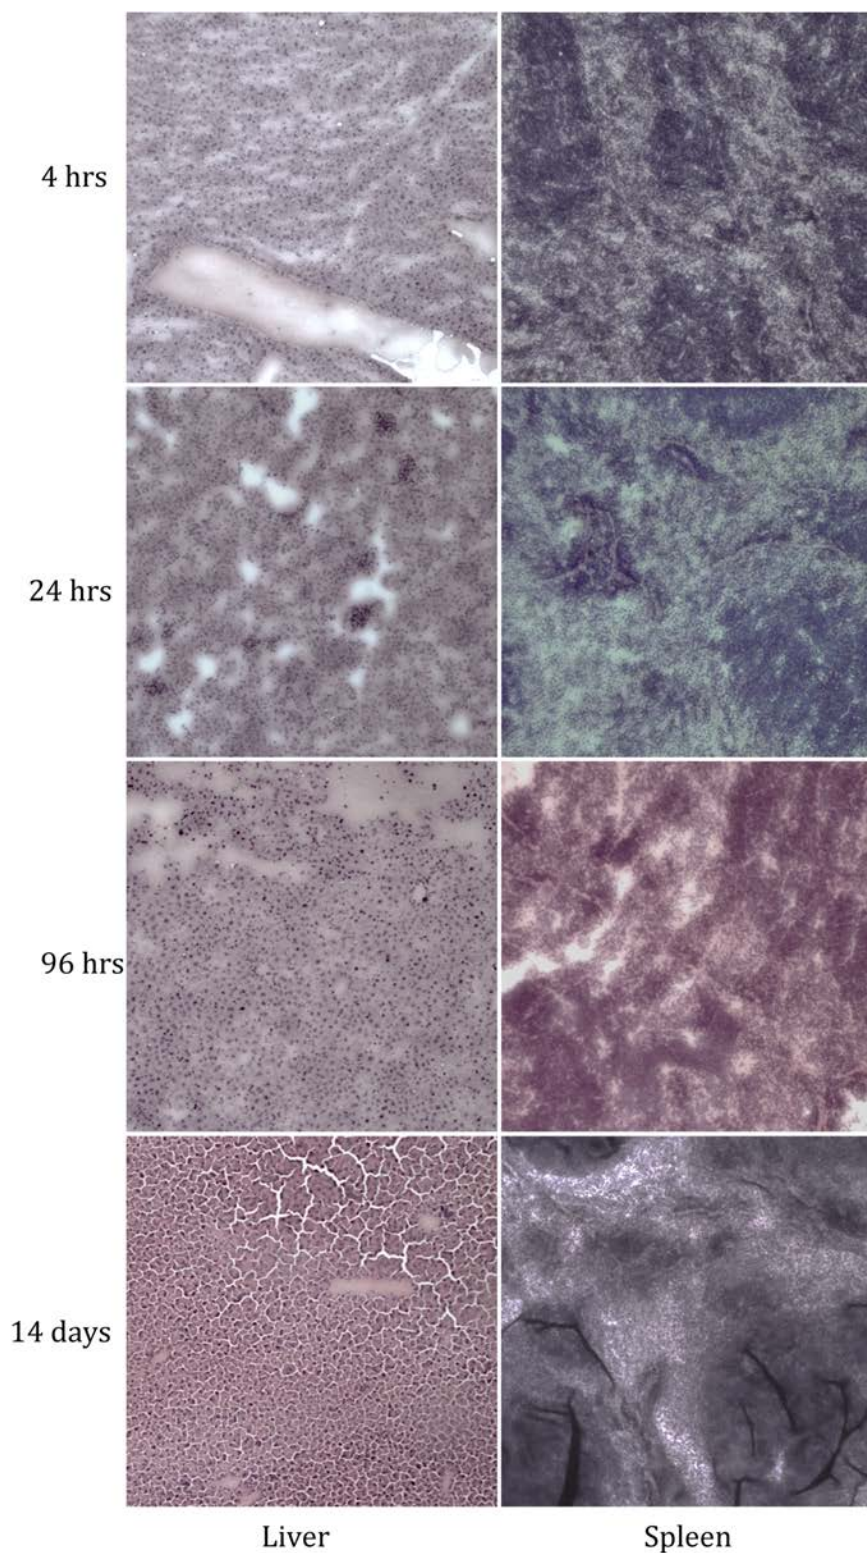

**Supporting Figure 4** Excised liver and spleens from mice 4, 24, 96 hours, and 14 days after being injected with Cy5-SNP were fixed and stained using H&E. No visible signs of toxicity were noticed. Images are 650 x 650  $\mu\text{m}$ .

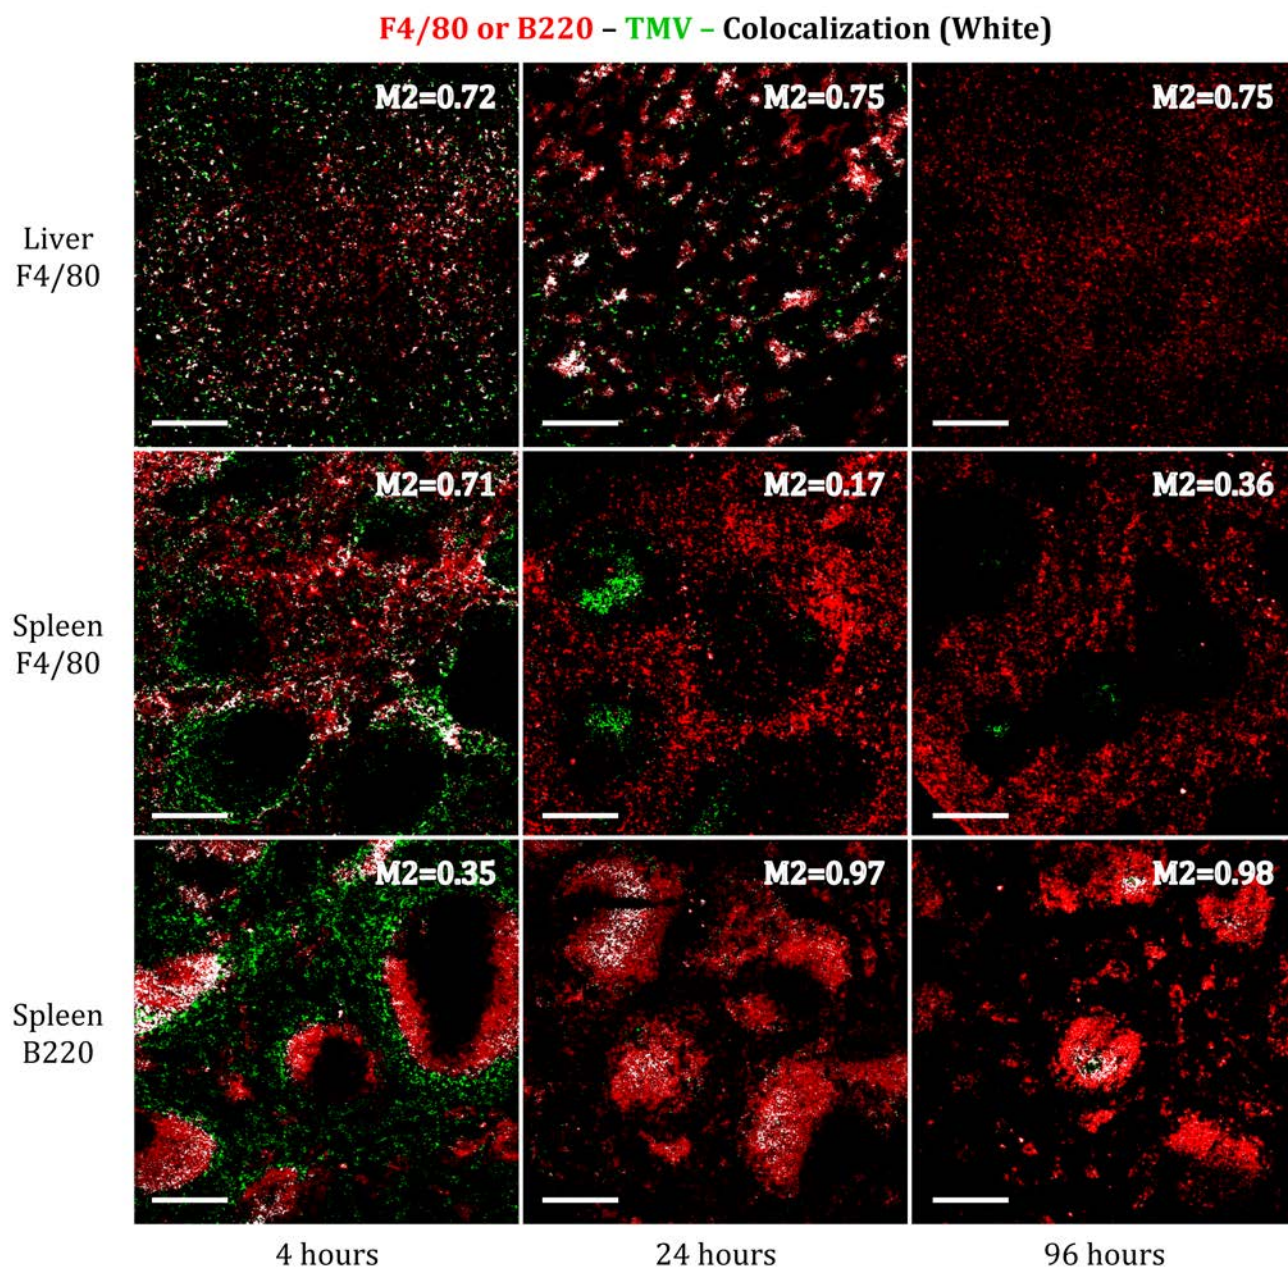

**Supporting Figure 5** Liver and spleen sections 4, 24, and 96 hours after i.v. administration of Cy5-TMV. Liver sections were stained for macrophages marker F4/80 (red). Spleen sections were stained for B-cell marker B220 (red) and macrophage marker F4/80 (red). Areas of colocalization between Cy5-TMV and cell markers appears white. Scale bars = 250  $\mu$ m.

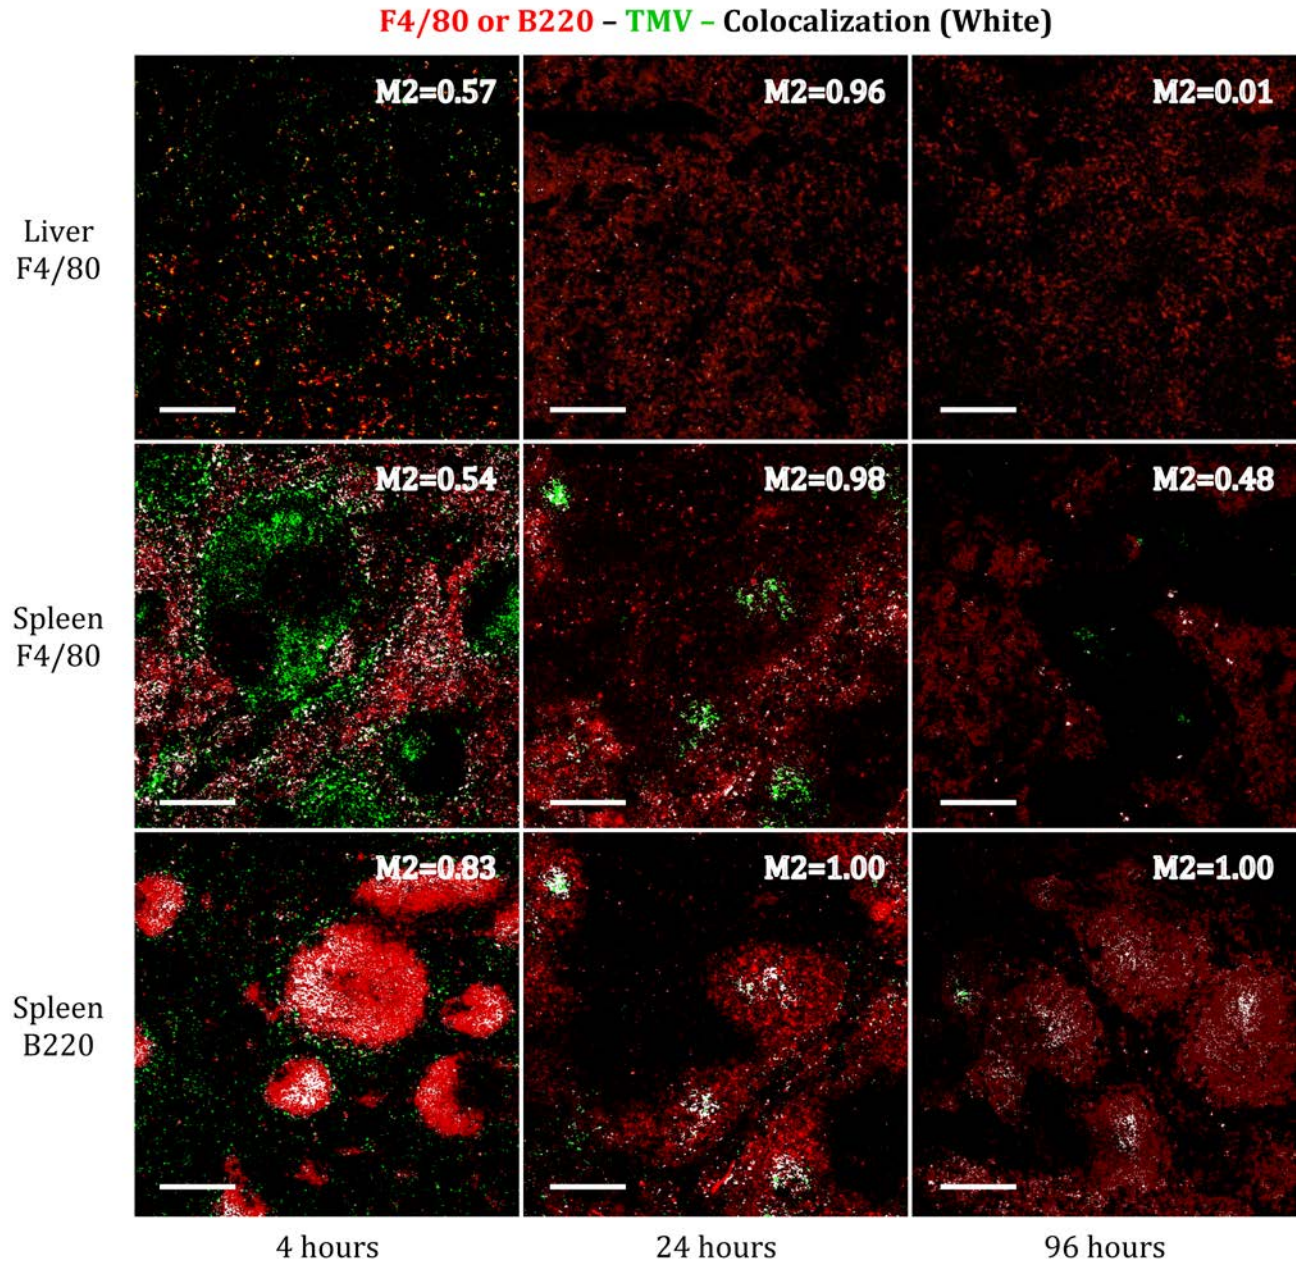

**Supporting Figure 6** Liver and spleen sections 4, 24, and 96 hours after i.v. administration of PEG-Cy5-TMV. Liver sections were stained for macrophages marker F4/80 (red). Spleen sections were stained for B-cell marker B220 (red) and macrophage marker F4/80 (red). Areas of colocalization between PEG-Cy5-TMV and cell markers appears white. Scale bars = 250  $\mu$ m.

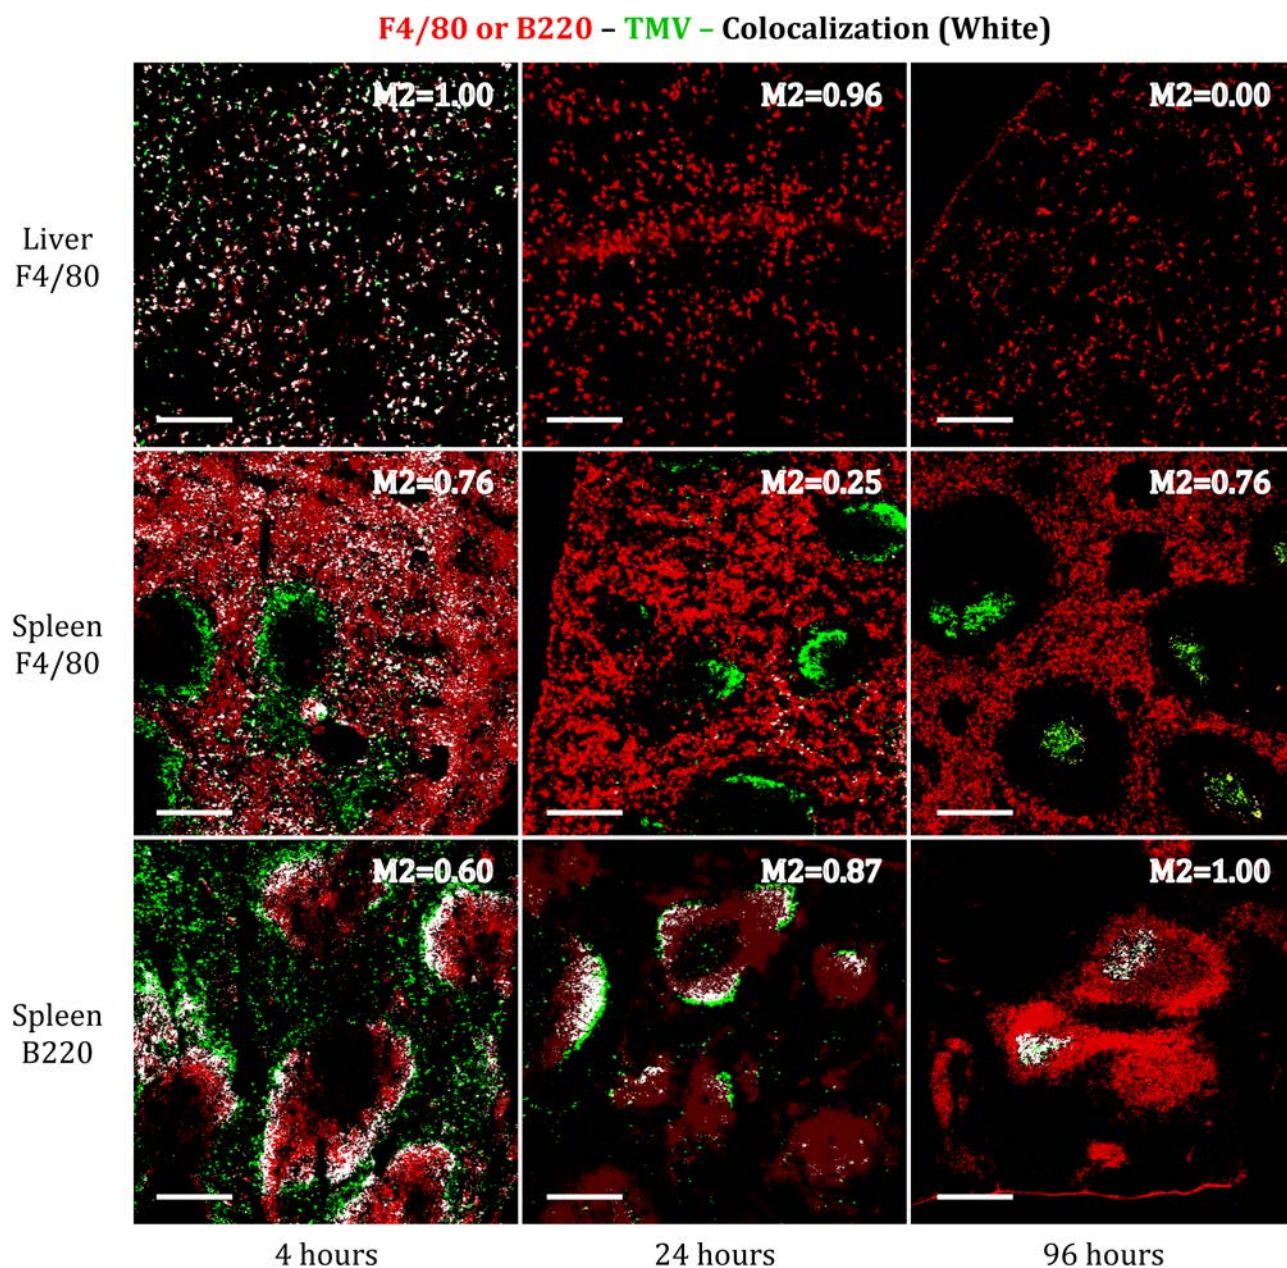

**Supporting Figure 7** Liver and spleen sections 4, 24, and 96 hours after i.v. administration of Cy5-SNP. Liver sections were stained for macrophages marker F4/80 (red). Spleen sections were stained for B-cell marker B220 (red) and macrophage marker F4/80 (red). Areas of colocalization between Cy5-SNP and cell markers appears white. Scale bars = 250  $\mu$ m.

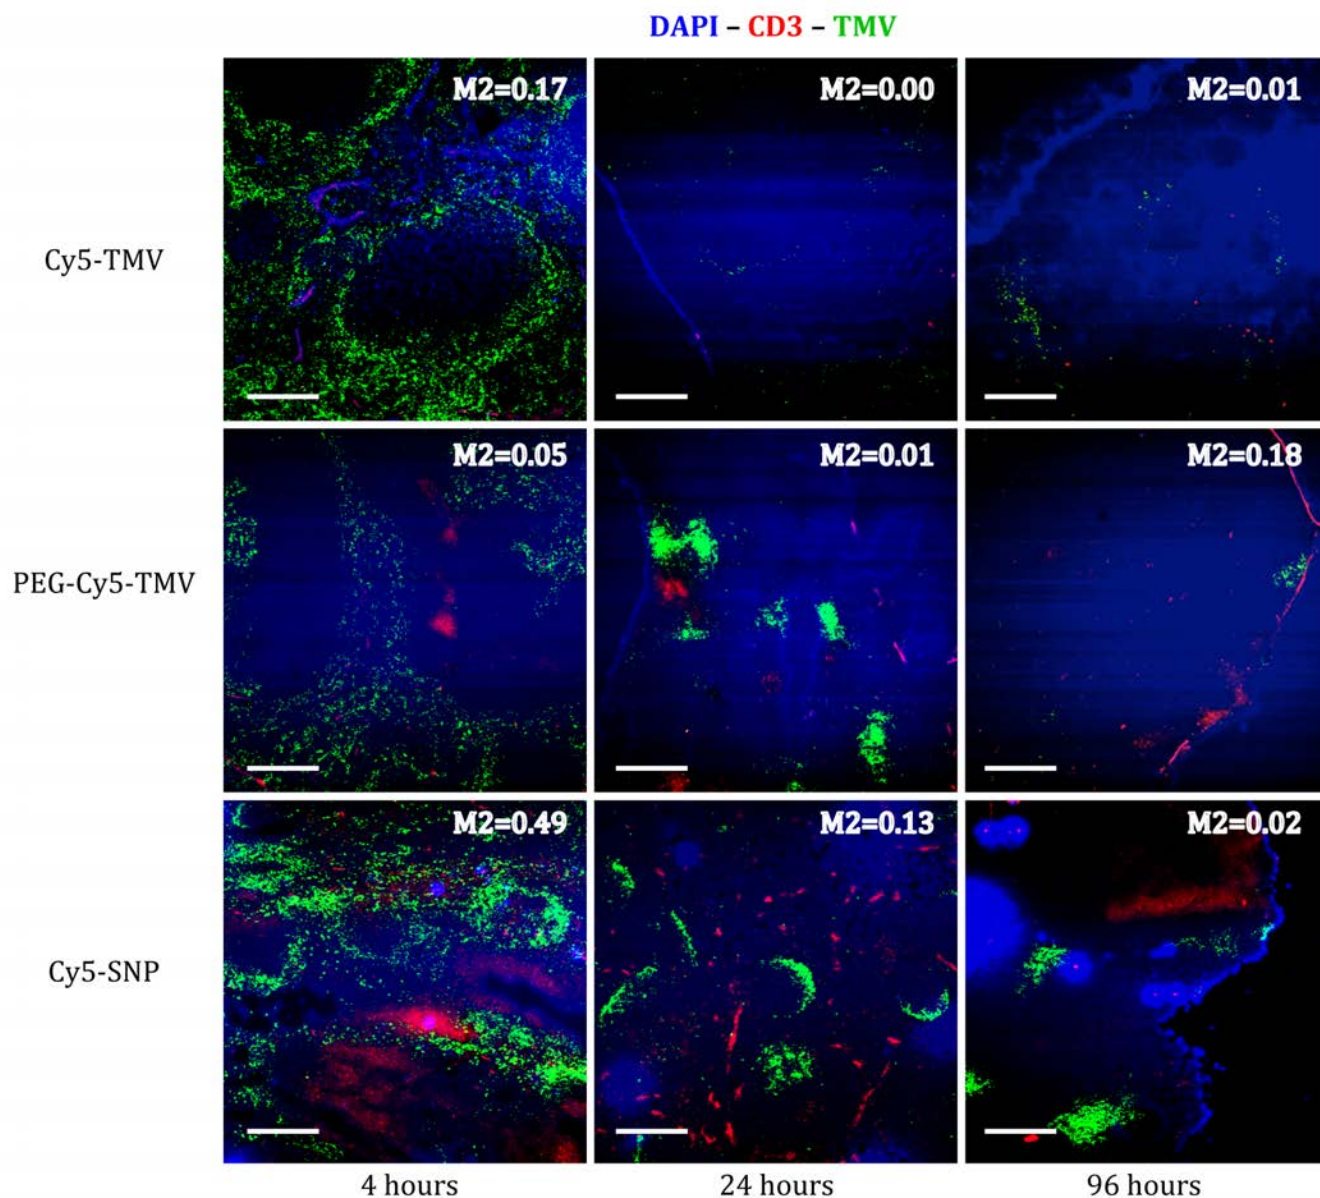

**Supporting Figure 8** Spleen sections 4, 24, and 96 hours after i.v. administration of Cy5-TMV, PEG-Cy5-TMV, and Cy5-SNP (colored green). Spleen sections were stained for T-cell marker CD3 (red). Cell nuclei are stained with DAPI (blue). Inset into each image is the Manders' M2 colocalization coefficient (M2=1.0 is attributed to 100% colocalization). Scale bars = 250  $\mu$ m.

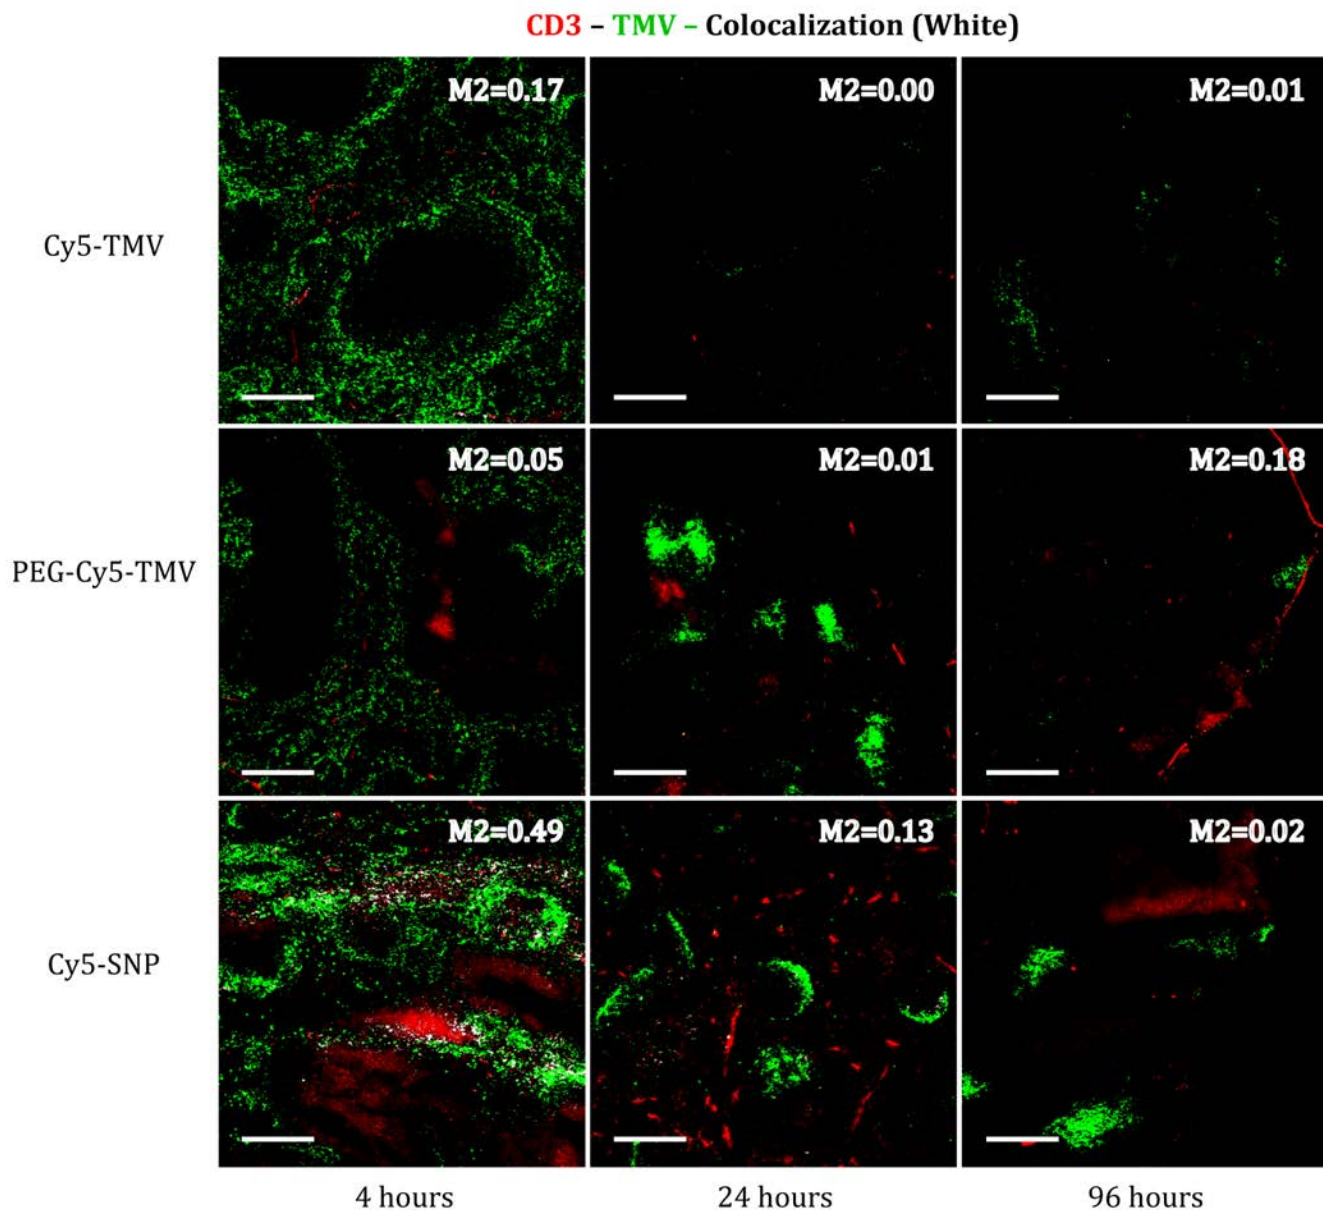

**Supporting Figure 9** Spleen sections 4, 24, and 96 hours after i.v. administration of Cy5-TMV, PEG-Cy5-TMV, and Cy5-SNP (colored green). Spleen sections were stained for T-cell marker CD3 (red). . Areas of colocalization between Cy5-SNP and cell markers appears white. Scale bars = 250  $\mu$ m.

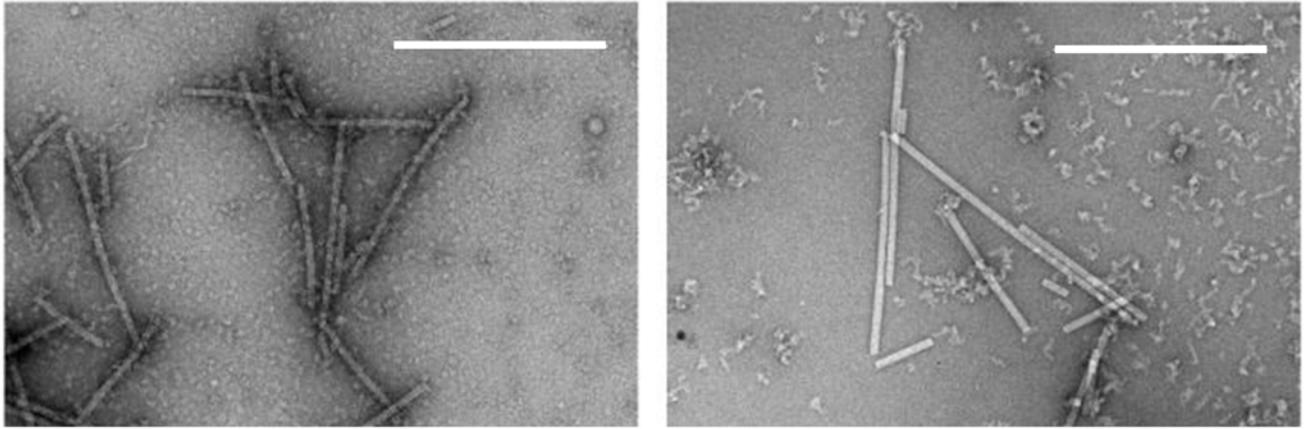

**Supporting Figure 10** TMV rods were incubated with plasma from mice. Native plasma (left panel) and heat inactivated plasma (right panel) was considered. The TMV samples were exposed to plasma for three hours, then collected through ultracentrifugation, followed by subsequent analysis by TEM imaging. Negatively-stained (UAc) samples were collected on a Tecnai G-2 Spirit (FEI Co.) equipped with a 2Kx2K CCD camera (TVIPS F224) at 29,000x magnification. The scale bar is 500 nm.
